# Supplementary material
Source: Springer Nature journal article supplement (https://www.springermedizin.de/resource/supplementary/13221_2010_5_MOESM1_ESM.pdf/9680802)

A

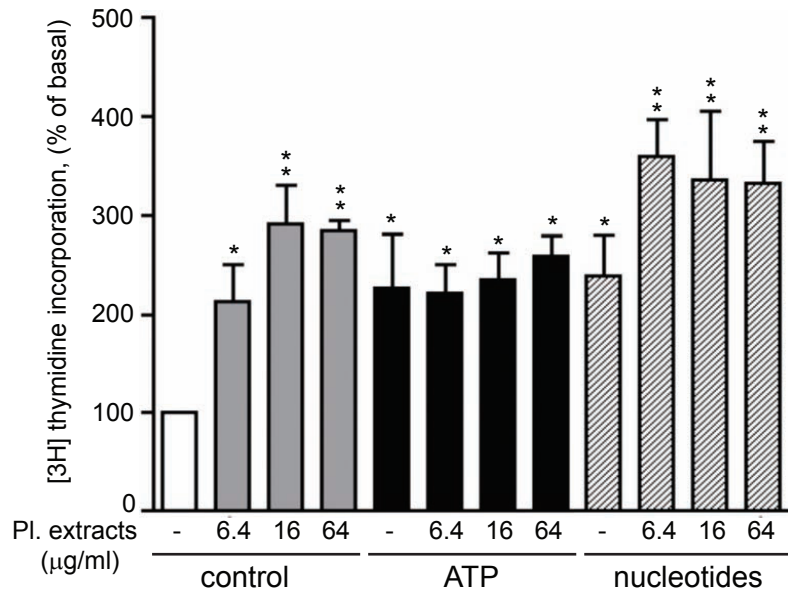

B

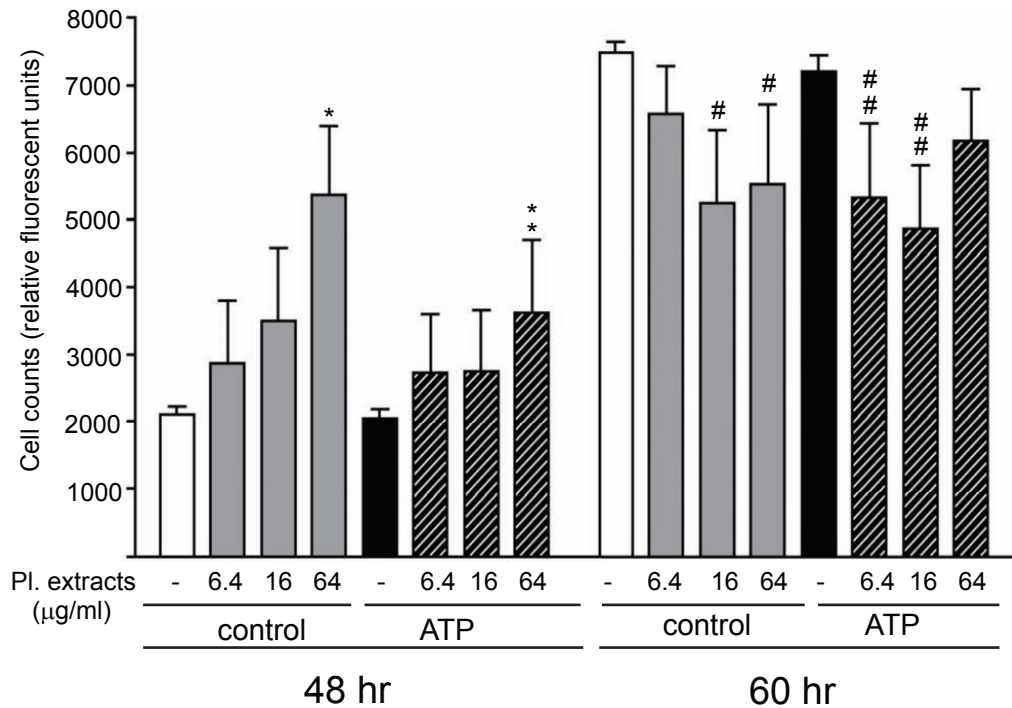

Supplement: MOESM1 [file 9680802]
